# Supplementary material for: Multidimensional structure of CoNi2S4 materials: structural regulation promoted electrochemical performance in a supercapacitor
Source: Royal Society of Chemistry journal article supplement (doi:10.1039/c9ra10961g), 2020-01-01
Supplement: c9ra10961g1.pdf [file c9ra10961g1.pdf]

## Supporting information

# Multidimensional structure of $\text{CoNi}_2\text{S}_4$ materials: structural regulation promoted electrochemical performance in a supercapacitor

Yue Han<sup>a</sup>, Shishuai Sun<sup>a\*</sup>, Wen Cui<sup>b\*</sup>, Jiachun Deng<sup>a</sup>

<sup>a</sup>College of Science, Tianjin University of Technology, Tianjin 300384, China

<sup>b</sup>College of physics and materials science, Tianjin Normal University, Tianjin, 300387, China

\*Corresponding author: Shishuai Sun, E-mail: sssdashuai@email.tjut.edu.cn; Wen Cui, E-mail: cuiwen2005xj@126.com;

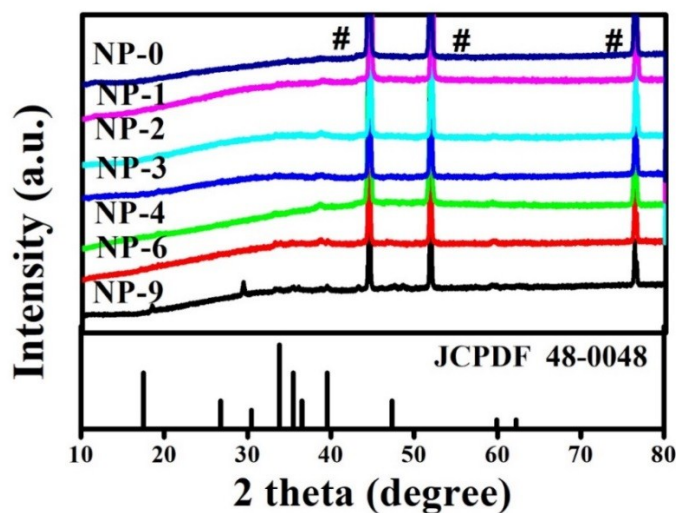

**Figure S1.** XRD pattern of NP-0, NP-1, NP-2, NP-3, NP-4, NP-6 and NP-9.

Figure S1 shows the XRD patterns of the precursor located on the Ni foam substrate.

The strong peaks at  $44.5^\circ$ ,  $51.8^\circ$  and  $76.4^\circ$  are matched with the Ni foam. The other diffraction peaks at approximately  $17.512^\circ$ ,  $26.749^\circ$ , and  $33.832^\circ$  can be indexed to the (020), (220), (211) reflections, which match well with  $\text{Co}_2(\text{CO}_3)_{0.5}(\text{OH})$  (JCPDS Card No. 48-0083). This is not surprising because the partial substitution of Ni ions for Co ions only results in insignificant changes in the structure. Therefore, it is reasonable to

deduce the formation of  $\text{NiCo}_2(\text{CO}_3)_{1.5}(\text{OH})_3$  in the precursor sample [1]. Figure S2 shows the XRD pattern of the as-synthesized NS sample. Except for the diffraction peaks from the Ni foam, the other diffraction peaks at  $31.47^\circ$ ,  $38.17^\circ$ ,  $50.25^\circ$  and  $55^\circ$  are indexed to the (311), (400), (411) and (440) planes of  $\text{CoNi}_2\text{S}_4$  (JCPDS Card No. 24-0334).

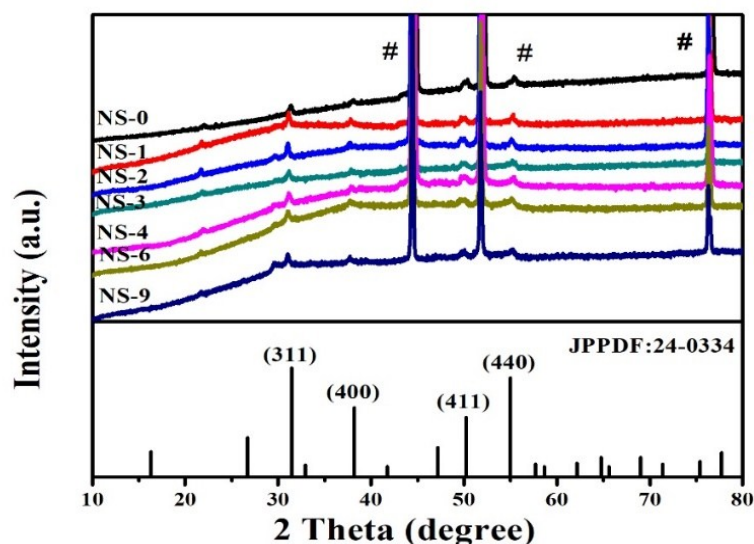

**Figure S2.** XRD pattern of NS-0, NS-1, NS-2, NS-3, NS-4, NS-6 and NS-9.

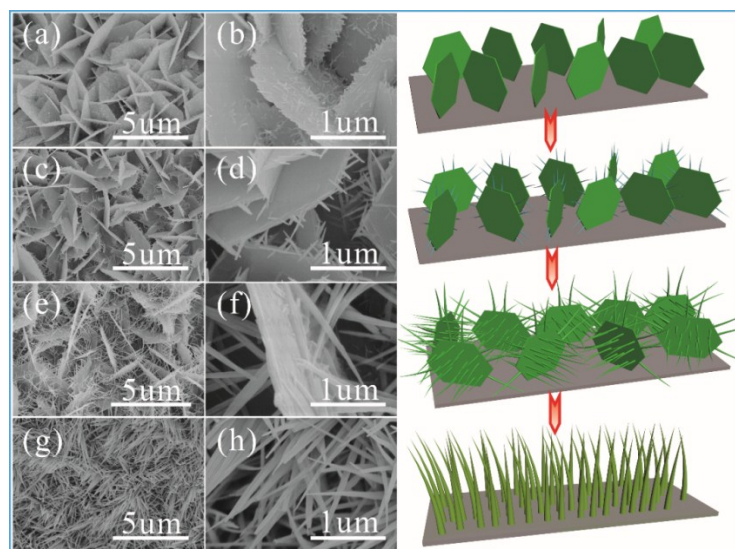

**Figure S3.** SEM images of the precursor obtained at different reaction stages with 3 mmol  $\text{NH}_4\text{F}$  and setting the run time at: (a, b) 0.5 h, (c, d) 1 h, (e, f) 8 h, and (g, h) 12 h. The right images are a schematic illustration of the morphologic evolution with increasing reaction time.

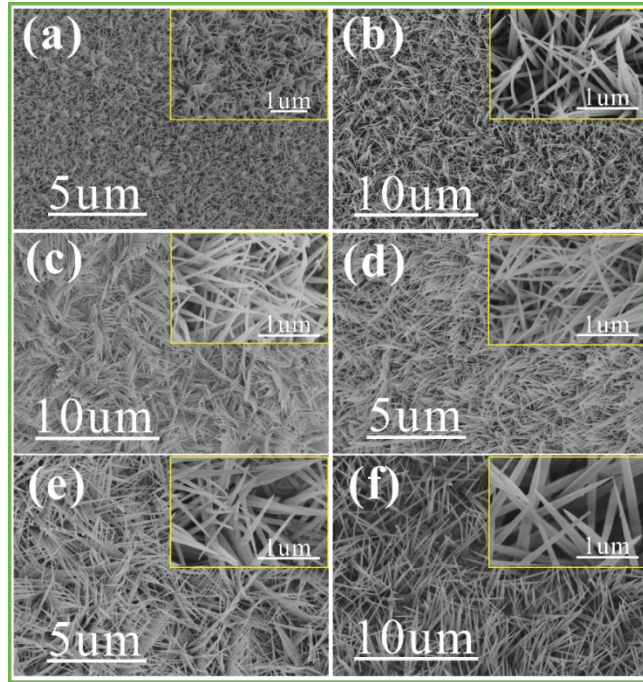

**Figure S4.** The evolution process of the precursor morphology affected by the concentration of  $\text{NH}_4\text{F}$ . (a-f) SEM images of NP-0, NP-1, NP-2, NP-4, NP-6 and NP-9, respectively.

From Figure S4, we can see that the small 2D nanoflake and 1D nanowire arrays of the Co-Ni precursor tend to form without adding any  $\text{NH}_4\text{F}$  into the reaction system (Figure S4a). When a low concentration of  $\text{NH}_4\text{F}$  is added into the reaction system, the small 2D nanoflakes disappear, and the intercrossing of 1D nanowire arrays to each other becomes dominant (Figure S4b). When the amount of  $\text{NH}_4\text{F}$  is 3 mmol, the hybrid-dimensional structure composed of 2D microsheets and 1D nanowires occupies the dominant position (Figure S3e-f). With a further increase of the concentration of  $\text{NH}_4\text{F}$ , the 2D microsheets disappear and turn into a dense nanowire array again (Figure S4e-f)<sup>[2-4]</sup>.

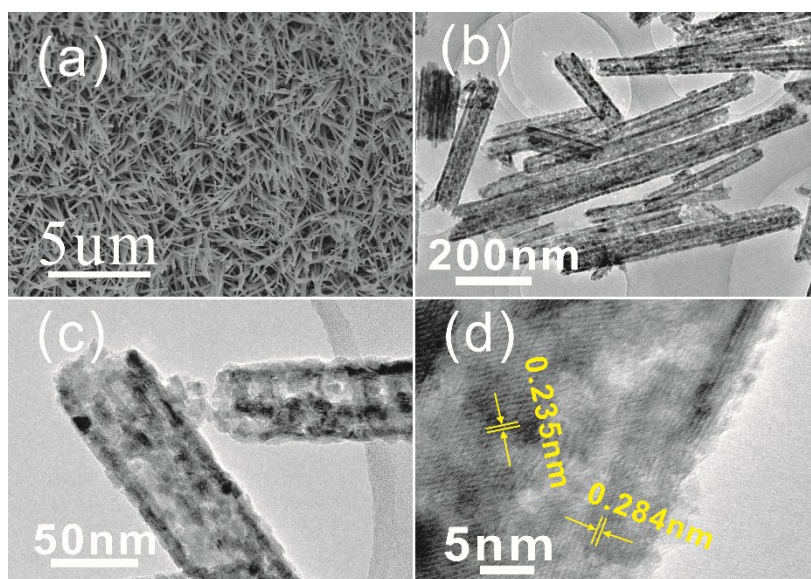

**Figure S5.** SEM images of the NS-9 sample (a). TEM, HRTEM and SRED images of the NS-9 sample (b-d), respectively.

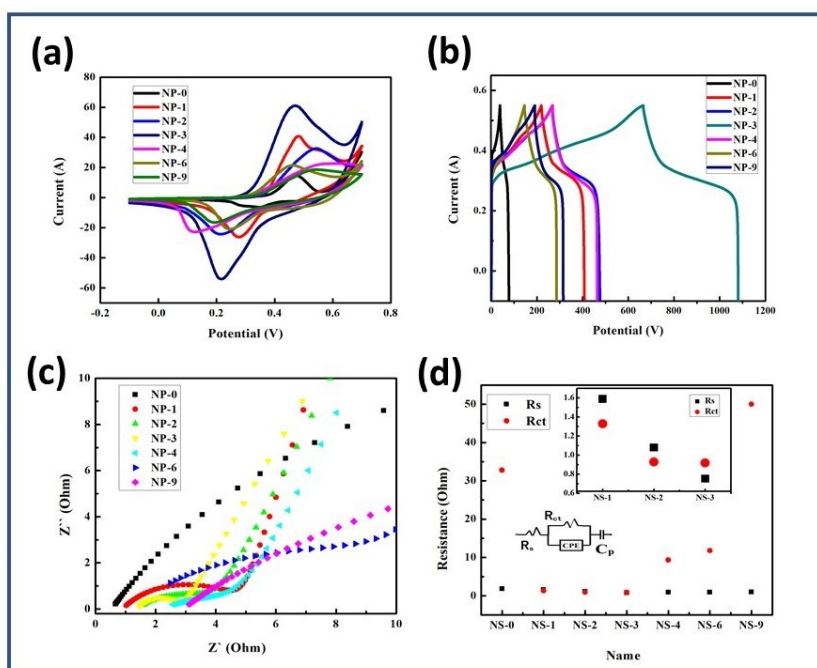

**Figure S6.** (a) CV curves of the NP samples at a scan rate of  $10 \text{ mV s}^{-1}$ . (b) GCD curves of the NP sample at a current density of  $3 \text{ A g}^{-1}$ . (c) Impedance Nyquist plots of the NP samples. (d) Derived  $R_s$  and  $R_{ct}$  from the Nyquist plots for each sample.

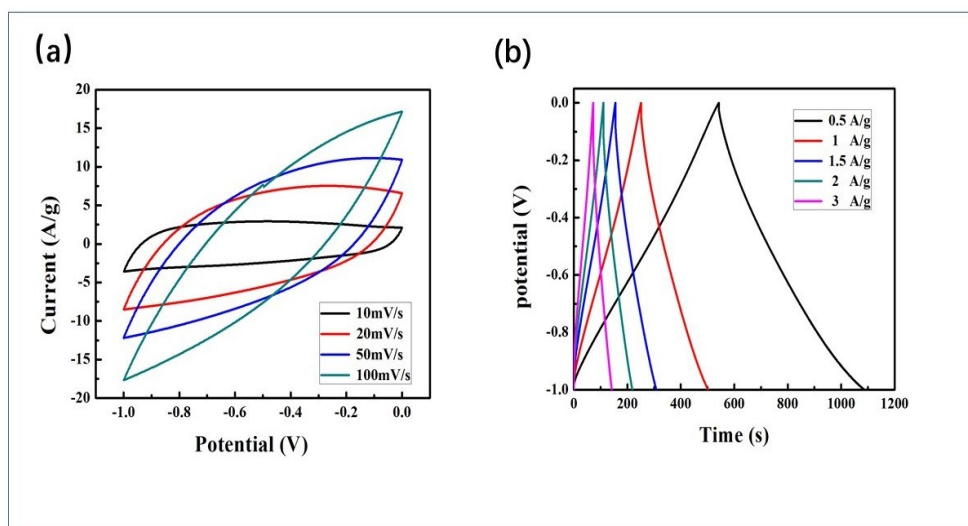

**Figure S7.** (a) CV curves of the AC at different scan rates and (b) discharge curves of the AC at different current densities.

- [1] J. Liao, P. Zou, S. Su, A. Nairan, Y. Wang, D. Wu, C. P. Wong, F. Kang and C. Yang, Hierarchical nickel nanowire@NiCo<sub>2</sub>S<sub>4</sub> nanowhiskers composite arrays with test-tube-brush-like structure for high-performance supercapacitors, *J. Mater. Chem. A*. 6 (2018) 15284-15293.
- [2] L. Lin, J. Liu, T. Liu, J. Hao, K. Ji, R. Sun, W. Zeng and Z. Wang, *J. Mater. Chem. A*, Growth-Controlled NiCo<sub>2</sub>S<sub>4</sub> Nanosheet Arrays with Self-Decorated Nanoneedles for High-Performance Pseudocapacitors. 3 (2015) 17652-17658.
- [3] Z. Cai, A. Wu, H. Yan, Y. Xiao, C. Chen, C. Tian, L. Wang, R. Wang and H. Fu, Hierarchical Whisker-on-sheet NiCoP with Adjustable Surface Structure for Efficient Hydrogen Evolution Reaction, *Nanoscale*. 10 (2018) 7619-7629.
- [4] X. J. Chen, D. Chen, X. Y. Guo, Facile Growth of Caterpillar-like NiCo<sub>2</sub>S<sub>4</sub> Nanocrystal Arrays on Nickel Foam for High-Performance Supercapacitors, *ACS Appl. Mater. Interfaces*. 9 (2017) 18774-18781.
